# Supplementary material
Source: PubMed Central journal article supplement (PMC3086586)
Supplement: NIHMS281986-supplement-Supp1.pdf [file NIHMS281986-supplement-Supp1.pdf]

Supplemental Table S1. Average fold changes in JNK small molecule inhibitor treatments relative to untreated controls. All fold changes > 1.3 and p-value < 0.05.

| Gene     | Average fold change | P-value |
|----------|---------------------|---------|
| ATF2     | -1.84               | 0.04375 |
| ATOH1    | -3.86               | 0.00373 |
| BARHL1   | -1.59               | 0.00953 |
| BRPF1    | -1.48               | 0.02797 |
| CDX1     | -1.45               | 0.02563 |
| CEBPG    | -1.76               | 0.00474 |
| DCP1A    | 2.15                | 0.00636 |
| DLX6     | -2.06               | 0.02448 |
| E2F3     | -1.61               | 0.04946 |
| EN2      | 1.43                | 0.04134 |
| EP300    | -1.53               | 0.04926 |
| ETV1     | -1.84               | 0.01406 |
| GFI1B    | -1.8                | 0.0327  |
| GORASP2  | -2.03               | 0.01369 |
| HEY2     | 1.52                | 0.04477 |
| HOXB3    | 2.05                | 0.0159  |
| HOXB8    | 1.36                | 0.0015  |
| HSF2BP   | -1.48               | 0.01955 |
| ID3      | -1.38               | 0.03158 |
| KCNN2    | 1.61                | 0.01724 |
| KIAA0161 | -2.45               | 0.01336 |
| LRP5     | -1.52               | 0.00245 |
| MEF2A    | -1.68               | 0.00552 |
| MEF2D    | -1.63               | 0.0318  |
| MLLT7    | 3                   | 0.01889 |
| MYH11    | 1.84                | 0.0392  |
| NAP1L1   | -1.97               | 0.01847 |
| NFAT5    | -1.68               | 0.00194 |
| NR4A2    | -1.56               | 0.03299 |
| PMX2B    | -1.67               | 0.00982 |
| RXRA     | -2.45               | 0.02784 |
| SCPEP1   | 1.61                | 0.00229 |
| SFRP4    | 2.55                | 0.03424 |
| SMARCB1  | -1.45               | 0.01814 |
| SMARCE1  | -1.42               | 0.0351  |
| TAF-172  | -2.12               | 0.00144 |
| TFEC     | -1.39               | 0.0323  |
| THRA     | 1.59                | 0.04827 |
| ZFAND6   | 1.4                 | 0.04252 |
| ZFX      | 3.8                 | 0.02685 |

Supplemental Table S2. Average fold changes in JunD siRNA treatments relative to GFP siRNA treated controls. JunD knockdown was confirmed by end-point semi-quantitative PCR, all other fold changes are > 1.3 and p-value < 0.05.

| Gene      | Average fold change | P-value |
|-----------|---------------------|---------|
| ALDH3A2   | -1.7                | 0.00709 |
| BCL11A    | 2.56                | 0.00079 |
| BLZF1     | 1.62                | 0.00618 |
| BRD1      | -1.9                | 0.0123  |
| CEBPG     | -2.22               | 0.011   |
| DEAF1     | -2.25               | 0.02818 |
| ELF3      | 2.1                 | 0.00369 |
| EMX2      | 2.14                | 0.00169 |
| EZH1      | -1.38               | 0.00025 |
| FAM48A    | 1.36                | 0.01181 |
| FEZL      | -2.12               | 0.01962 |
| FOXP1     | -1.92               | 0.02737 |
| GATA3     | 1.65                | 0.0162  |
| GTF2A1    | 1.3                 | 0.00539 |
| HEY2      | 1.6                 | 0.01008 |
| HOXA6     | 1.31                | 0.0011  |
| HOXD8     | 1.58                | 0.0081  |
| JIK       | 1.44                | 0.00009 |
| KIAA0130  | -1.81               | 0.03623 |
| KLF5      | -1.67               | 0.00434 |
| LHX5      | -2.04               | 0.01443 |
| LHX6      | -1.63               | 0.01008 |
| LOC772263 | 1.61                | 0.0198  |
| LRP5      | -1.5                | 0.01779 |
| MDN1      | -1.46               | 0.00434 |
| NEUROD6   | -2.34               | 0.01428 |
| NFE2L2    | -1.36               | 0.01565 |
| NR1I3     | -1.68               | 0.03802 |
| NR2E1     | 2.6                 | 0.00067 |
| PCMT1     | -2.11               | 0.04481 |
| PMX1      | -1.75               | 0.00663 |
| PRDM16    | -1.72               | 0.00343 |
| PRELP     | -2.01               | 0.03844 |
| PURA      | -1.61               | 0.0129  |
| RARA      | -1.33               | 0.03953 |
| SHH       | -1.96               | 0.03742 |
| SMARCA2   | 1.57                | 0.01549 |
| SNAPC4    | 1.66                | 0.04773 |
| SUPT4H1   | -1.35               | 0.00736 |
| TAF-172   | -1.37               | 0.0061  |
| TCF21     | -1.36               | 0.0398  |
| TFAP2B    | -1.98               | 0.00208 |
| TGIF      | 1.41                | 0.04588 |
| WHSC1     | 1.39                | 0.00667 |
| ZFP3      | 1.56                | 0.00096 |
| ZIC4      | 1.3                 | 0.04011 |
| ZID       | 1.66                | 0.00032 |

ZNF143 -2.87 0.03757

Supplemental Table S3. Average fold changes in CEBPG siRNA treatments relative to GFP siRNA treated controls. All fold changes > 1.3 and p-value < 0.05.

| GeneID   | Average fold change | P- value |
|----------|---------------------|----------|
| AEBP2    | 2.55                | 0.02715  |
| ALDH3A2  | -5.95               | 0.00182  |
| ALDH4A1  | -1.79               | 0.01266  |
| ALX4     | -5.96               | 0.02052  |
| ARID1A   | 2.21                | 0.00772  |
| ASCL1    | -5.09               | 0.03264  |
| ATF2     | -4.4                | 0.01554  |
| ATOH1    | 1.91                | 0.01676  |
| BARHL1   | -2.65               | 0.01138  |
| BATF3    | 3.18                | 0.00206  |
| BC052625 | 1.43                | 0.03388  |
| BMI1     | -2.55               | 0.02593  |
| Bmp11    | 4.05                | 0.01105  |
| Bmp3     | 2.48                | 0.01865  |
| Bmp4     | 1.61                | 0.00082  |
| Bmp8a    | 2.51                | 0.01818  |
| Bmp9     | 1.69                | 0.01234  |
| Bmpr1a   | 1.83                | 0.03068  |
| Bmpr2    | 2.27                | 0.01001  |
| BRD1     | -8.18               | 0.01436  |
| BRN-3A   | 2.05                | 0.02682  |
| BRPF1    | -2.09               | 0.03152  |
| BRUNOL4  | -2.3                | 0.01806  |
| BTBD1    | 2.82                | 0.03384  |
| BTBD14A  | 1.55                | 0.01718  |
| CBFA2T3  | 2.1                 | 0.04458  |
| CDH23    | 3.34                | 0.01199  |
| CDK9     | -1.72               | 0.04315  |
| CDKL2    | 1.53                | 0.02541  |
| CEBPG    | -3.92               | 0.0178   |
| CHD1     | -4.96               | 0.04074  |
| CLDN14   | 1.61                | 0.04503  |
| CLOCK    | 1.74                | 0.00412  |
| CNOT4    | -2.28               | 0.00543  |
| CREB1    | 1.7                 | 0.01312  |
| CREB3L2  | -4.3                | 0.04769  |
| CSRP2    | -2.55               | 0.01379  |
| CTNNB1   | 2.68                | 0.03512  |
| CYLD     | -4.03               | 0.01772  |
| DACH     | 3.14                | 0.01045  |
| DAZAP1   | -4.01               | 0.01811  |
| DEAF1    | -4.46               | 0.03461  |

|          |       |         |
|----------|-------|---------|
| DII4     | 2.5   | 0.0197  |
| DR1      | 4.48  | 0.01548 |
| EEF1A1   | -4.44 | 0.0407  |
| EIF2B2   | 3.24  | 0.04663 |
| ELAVL2   | 2.17  | 0.0335  |
| ELL      | -1.8  | 0.04875 |
| ENO1     | -2    | 0.00839 |
| ETV4     | 2.69  | 0.01387 |
| EYA4     | -1.87 | 0.00219 |
| FEZL     | -4.81 | 0.01534 |
| FEZL     | -5.54 | 0.03053 |
| Fgf12    | -2.38 | 0.04495 |
| Fgf13    | -2.71 | 0.03439 |
| Fgf16    | -6.59 | 0.01411 |
| Fgf20    | 6.04  | 0.04406 |
| FHL2     | -5.43 | 0.0167  |
| FLJ11040 | 2.59  | 0.01738 |
| FOG2     | -4.13 | 0.01927 |
| FOXA2    | 4.11  | 0.00877 |
| FOXC2    | -2.86 | 0.03208 |
| FOXG1B   | 6.12  | 0.02161 |
| FOXP1    | -7.31 | 0.03633 |
| FOXP4    | 2.32  | 0.01942 |
| FREQ     | 3.33  | 0.03391 |
| Fzd3     | -1.63 | 0.03667 |
| Fzd4     | 4.02  | 0.0175  |
| GATA3    | 2.35  | 0.05068 |
| GFI1B    | 3.96  | 0.02474 |
| GORASP2  | -1.75 | 0.04703 |
| GPA33    | 1.82  | 0.03584 |
| GSC      | -1.69 | 0.02695 |
| GTF2B    | -1.67 | 0.02081 |
| GTF2E2   | -8.21 | 0.00048 |
| H2AFY    | 2.57  | 0.01554 |
| HES5     | -3.78 | 0.03251 |
| HES5     | 1.89  | 0.04241 |
| HKR3     | 1.89  | 0.01581 |
| HMG20A   | 4.46  | 0.01259 |
| HOXA10   | -3.04 | 0.00294 |
| HOXA7    | -5.78 | 0.02946 |
| HOXC10   | 2.04  | 0.02496 |
| HRY      | -2.11 | 0.04924 |
| HSPC063  | 1.42  | 0.03978 |
| HSPX153  | -3.26 | 0.00096 |
| ID3      | -5.09 | 0.02349 |
| IFT172   | -2.16 | 0.01046 |
| IRF6     | 4.11  | 0.01029 |
| Jag2     | 1.7   | 0.0426  |
| JARID1A  | -5.03 | 0.03911 |
| KLF1     | -3.69 | 0.02624 |

|           |       |         |
|-----------|-------|---------|
| KLF15     | 2.83  | 0.00748 |
| KLF5      | -4.59 | 0.0257  |
| KLHL1     | 2.66  | 0.03714 |
| KLHL1     | 1.59  | 0.01457 |
| KLHL25    | 2.75  | 0.02401 |
| KRT12     | 1.49  | 0.01689 |
| LARP1     | -2.14 | 0.04177 |
| Lfng      | 4.41  | 0.01572 |
| LHX3      | -2.46 | 0.01783 |
| LHX8      | -4.75 | 0.01002 |
| LOC152485 | -1.75 | 0.02303 |
| LOC51652  | 2.55  | 0.00635 |
| LOC771525 | 3.22  | 0.02052 |
| LOC772263 | 1.84  | 0.03084 |
| LRP5      | -4.39 | 0.01861 |
| MADH1     | -3.3  | 0.01717 |
| MADH2     | 1.95  | 0.02258 |
| MADH5     | -1.86 | 0.02175 |
| MADH7     | -3.89 | 0.0152  |
| MAFG      | -1.49 | 0.04327 |
| MBNL2     | -1.85 | 0.03537 |
| Mfng      | 3.19  | 0.00244 |
| MGC16733  | -5.64 | 0.01322 |
| MID2      | -2.37 | 0.04879 |
| MLL3      | 3.42  | 0.0408  |
| MLLT10    | -2.41 | 0.03251 |
| MLLT6     | -3.25 | 0.02008 |
| MLLT7     | -2    | 0.01936 |
| MNT       | 5.03  | 0.01175 |
| MORF4     | -3.7  | 0.02657 |
| MSX1      | 2.82  | 0.00959 |
| MSX2      | 1.94  | 0.01357 |
| MTF1      | -3.04 | 0.03254 |
| MTF2      | -5.01 | 0.00154 |
| MXD4      | -1.85 | 0.02115 |
| MXI1      | -2.29 | 0.015   |
| MYH11     | 1.88  | 0.01693 |
| MYH9      | 4.11  | 0.01967 |
| MYO6      | -2.1  | 0.02708 |
| MYOD1     | -6.02 | 0.02566 |
| MYT1      | -3.99 | 0.03844 |
| MYT1L     | -4.38 | 0.00602 |
| NCOA2     | -7.18 | 0.00137 |
| NCOR2     | -4.85 | 0.01401 |
| NEUROD6   | -8.74 | 0.02847 |
| NFE2L2    | -9.83 | 0.00306 |
| NFIC      | -3.52 | 0.03787 |
| NFKBIA    | 2.71  | 0.00146 |
| NFYC      | 1.48  | 0.01901 |
| NKRF      | -1.67 | 0.05042 |

|          |       |         |
|----------|-------|---------|
| NKX6-2   | 1.83  | 0.0158  |
| Nog      | 1.54  | 0.02221 |
| NONO     | 2.7   | 0.01333 |
| Notch1   | 1.59  | 0.00547 |
| NR1D2    | -2.75 | 0.02396 |
| NR1I3    | -6.65 | 0.0126  |
| NUP153   | -4.88 | 0.02545 |
| OTOF     | 1.64  | 0.01307 |
| OVOL2    | -2.99 | 0.02102 |
| PAX3     | -2.18 | 0.0434  |
| PAX6     | 3.36  | 0.00702 |
| PCMT1    | -6.91 | 0.01167 |
| PLAG1    | -1.76 | 0.02475 |
| PMX2B    | -7.6  | 0.01076 |
| PPIB     | 3.78  | 0.01578 |
| PRDM11   | -1.56 | 0.02776 |
| PRDM15   | 2.23  | 0.01135 |
| PRPF4    | 2.82  | 0.04425 |
| PSMC1    | 2.68  | 0.00879 |
| QDPR     | 2.22  | 0.02796 |
| R32184_3 | 1.71  | 0.01825 |
| RAI15    | -1.95 | 0.00404 |
| RARA     | -2.38 | 0.0442  |
| RAX      | -1.67 | 0.02078 |
| REST     | -2.05 | 0.03065 |
| RFXANK   | 1.93  | 0.02546 |
| RIC3     | 3.02  | 0.00105 |
| RIP60    | -2.95 | 0.01418 |
| RNF12    | -2.58 | 0.00181 |
| Rxrg     | -4.4  | 0.02716 |
| SCA2     | -3.24 | 0.03256 |
| SETBP1   | -2.78 | 0.0196  |
| SHH      | -4.35 | 0.02241 |
| SIAH1    | -7.05 | 0.01762 |
| SIX1     | 2.24  | 0.02194 |
| SIX3     | 1.76  | 0.03614 |
| SMARCA2  | -1.61 | 0.03791 |
| SMARCA5  | 2.8   | 0.04924 |
| SMARCC1  | 2.62  | 0.0346  |
| SNW1     | 3.28  | 0.01118 |
| SOX1     | -2.81 | 0.02    |
| SOX10    | 1.72  | 0.00146 |
| SOX13    | 2.3   | 0.04484 |
| SOX14    | 2.03  | 0.03133 |
| SOX21    | -3.01 | 0.02187 |
| SOX7     | 2.95  | 0.04163 |
| SPOP     | -3.27 | 0.04332 |
| STOML1   | -3.9  | 0.02312 |
| SURB7    | 2.41  | 0.00521 |
| TAF-172  | -2.02 | 0.05039 |

|         |       |         |
|---------|-------|---------|
| TAF2A   | 1.74  | 0.01574 |
| TAF2B   | 2.39  | 0.02025 |
| TAF3    | -6.68 | 0.0209  |
| TAL2    | 3.74  | 0.00717 |
| TBP     | -3.81 | 0.0434  |
| TEAD3   | 2.06  | 0.01946 |
| TGFBR3  | -3.4  | 0.02431 |
| TGIF    | -3.55 | 0.03617 |
| TIEG    | 1.93  | 0.04504 |
| TITF1   | -3.74 | 0.01405 |
| TLE4    | -2.37 | 0.0326  |
| TMC1    | 3.36  | 0.01336 |
| TNRC15  | 2.61  | 0.00243 |
| TNRC9   | -5.03 | 0.02731 |
| TRAF5   | -1.99 | 0.01569 |
| TSC22D3 | 3.81  | 0.01305 |
| UBC     | 2.57  | 0.0123  |
| Wnt1    | 1.95  | 0.01061 |
| Wnt16   | 2.93  | 0.01211 |
| Wnt3    | -5.35 | 0.01221 |
| Wnt4    | 5.48  | 0.01669 |
| Wnt7b   | 1.97  | 0.00196 |
| Wnt8a   | 2.21  | 0.01298 |
| Wnt9b   | 4.03  | 0.01186 |
| ZBTB2   | 3.2   | 0.01141 |
| ZBTB26  | -4.13 | 0.04256 |
| ZFP64   | -1.48 | 0.04977 |
| ZFPM1   | 1.76  | 0.01364 |
| ZNF161  | 3.05  | 0.01979 |
| ZNF503  | -2.12 | 0.01954 |
| ZYX     | 2.9   | 0.0317  |

Supplemental Table S4. Genes commonly up or down-regulated in CEBPG and LRP5 individual siRNA knockdowns. All fold changes > 1.3 and p-value < 0.05.

| GeneID  | CEBPG | P-value | LRP5  | P-value |
|---------|-------|---------|-------|---------|
| AEBP2   | 2.55  | 0.02715 | 2.72  | 0.04307 |
| ALDH3A2 | -5.95 | 0.00182 | -5.08 | 0.01125 |
| ALX4    | -5.96 | 0.02052 | -9.53 | 0.00017 |
| ASCL1   | -5.09 | 0.03264 | -4.54 | 0.00225 |
| ATOH1   | 1.91  | 0.01676 | 3.23  | 0.01383 |
| BATF3   | 3.18  | 0.00206 | 2.86  | 0.007   |
| BMI1    | -2.55 | 0.02593 | -1.87 | 0.00989 |
| Bmp3    | 2.48  | 0.01865 | 3.48  | 0.01031 |
| BRD1    | -8.18 | 0.01436 | -4.57 | 0.00571 |
| CHD1    | -4.96 | 0.04074 | -8.75 | 0.00006 |
| CREB3L2 | -4.3  | 0.04769 | -3.29 | 0.02514 |
| CSRP2   | -2.55 | 0.01379 | -3.15 | 0.0047  |

|          |       |         |       |         |
|----------|-------|---------|-------|---------|
| CTNNB1   | 2.68  | 0.03512 | 3     | 0.01848 |
| CYLD     | -4.03 | 0.01772 | -3.25 | 0.00989 |
| DAZAP1   | -4.01 | 0.01811 | -8.49 | 0.00044 |
| DEAF1    | -4.46 | 0.03461 | -5.48 | 0.00067 |
| DII4     | 2.5   | 0.0197  | 3.34  | 0.00839 |
| DR1      | 4.48  | 0.01548 | 4.27  | 0.00166 |
| EEF1A1   | -4.44 | 0.0407  | -7.04 | 0.00292 |
| ELAVL2   | 2.17  | 0.0335  | 2.23  | 0.04067 |
| FEZL     | -5.54 | 0.03053 | -8.08 | 0.00069 |
| FEZL     | -4.81 | 0.01534 | -3.47 | 0.03295 |
| Fgf13    | -2.71 | 0.03439 | -7.15 | 0.00008 |
| Fgf16    | -6.59 | 0.01411 | -8.65 | 0.00012 |
| Fgf20    | 6.04  | 0.04406 | 3.33  | 0.00134 |
| FHL2     | -5.43 | 0.0167  | -4.74 | 0.00113 |
| FLJ11040 | 2.59  | 0.01738 | 4.34  | 0.00148 |
| FOG2     | -4.13 | 0.01927 | -3.1  | 0.01669 |
| FOXA2    | 4.11  | 0.00877 | 4.44  | 0.03313 |
| FOXC2    | -2.86 | 0.03208 | -3.14 | 0.00345 |
| FOXP1    | -7.31 | 0.03633 | -7.02 | 0.00362 |
| FREQ     | 3.33  | 0.03391 | 4.2   | 0.02041 |
| GATA3    | 2.35  | 0.05068 | 2.52  | 0.02665 |
| HES5     | 1.89  | 0.04241 | 1.99  | 0.02062 |
| HOXA7    | -5.78 | 0.02946 | -7.39 | 0.00383 |
| ID3      | -5.09 | 0.02349 | -7.19 | 0.00029 |
| IRF6     | 4.11  | 0.01029 | 3.02  | 0.00829 |
| JARID1A  | -5.03 | 0.03911 | -6.81 | 0.0004  |
| KLF1     | -3.69 | 0.02624 | -3.31 | 0.0008  |
| KLF5     | -4.59 | 0.0257  | -3.01 | 0.00963 |
| KLHL1    | 2.66  | 0.03714 | 3.12  | 0.00349 |
| KLHL25   | 2.75  | 0.02401 | 3.91  | 0.00084 |
| LOC51652 | 2.55  | 0.00635 | 2.94  | 0.00971 |
| LRP5     | -4.39 | 0.01861 | -5.71 | 0.00035 |
| MADH1    | -3.3  | 0.01717 | -3.46 | 0.03198 |
| MADH7    | -3.89 | 0.0152  | -5.62 | 0.00209 |
| MBNL2    | -1.85 | 0.03537 | -3.73 | 0.00118 |
| MGC16733 | -5.64 | 0.01322 | -7.36 | 0.00152 |
| MID2     | -2.37 | 0.04879 | -7.97 | 0.00542 |
| MLLT6    | -3.25 | 0.02008 | -5.77 | 0.00013 |
| MNT      | 5.03  | 0.01175 | 4.33  | 0.01327 |
| MSX1     | 2.82  | 0.00959 | 5.83  | 0.00006 |
| MTF1     | -3.04 | 0.03254 | -2.93 | 0.01283 |
| MTF2     | -5.01 | 0.00154 | -2.95 | 0.01069 |
| MXD4     | -1.85 | 0.02115 | -2.03 | 0.02043 |
| MYH9     | 4.11  | 0.01967 | 3.8   | 0.0136  |
| MYO6     | -2.1  | 0.02708 | -2.99 | 0.00612 |
| MYOD1    | -6.02 | 0.02566 | -7.18 | 0.00812 |
| MYT1     | -3.99 | 0.03844 | -3.01 | 0.01649 |
| MYT1L    | -4.38 | 0.00602 | -4.05 | 0.00709 |
| NCOA2    | -7.18 | 0.00137 | -5.16 | 0.00074 |
| NEUROD6  | -8.74 | 0.02847 | -7.69 | 0.00011 |



|          |       |         |       |         |
|----------|-------|---------|-------|---------|
| NONO     | 2.7   | 0.01333 | 3.77  | 0.00351 |
| NR1I3    | -6.65 | 0.0126  | -4.78 | 0.01252 |
| NUP153   | -4.88 | 0.02545 | -6.9  | 0.01001 |
| OVOL2    | -2.99 | 0.02102 | -6.13 | 0.04356 |
| PAX3     | -2.18 | 0.0434  | -3.02 | 0.00159 |
| PCMT1    | -6.91 | 0.01167 | -9.28 | 0.00059 |
| PRPF4    | 2.82  | 0.04425 | 2.7   | 0.01283 |
| PSMC1    | 2.68  | 0.00879 | 3     | 0.00294 |
| R32184_3 | 1.71  | 0.01825 | 2.57  | 0.01586 |
| RARA     | -2.38 | 0.0442  | -3.12 | 0.00287 |
| RIP60    | -2.95 | 0.01418 | -3.13 | 0.00359 |
| Rxrg     | -4.4  | 0.02716 | -7.28 | 0.00093 |
| SCA2     | -3.24 | 0.03256 | -6.67 | 0.00041 |
| SHH      | -4.35 | 0.02241 | -5.02 | 0.00269 |
| SIAH1    | -7.05 | 0.01762 | -4.16 | 0.04671 |
| SIX1     | 2.24  | 0.02194 | 2.98  | 0.00678 |
| SIX3     | 1.76  | 0.03614 | 3.04  | 0.02718 |
| SMARCA5  | 2.8   | 0.04924 | 10.48 | 0.00006 |
| SNW1     | 3.28  | 0.01118 | 5.2   | 0.00071 |
| SOX13    | 2.3   | 0.04484 | 3.91  | 0.00362 |
| SPOP     | -3.27 | 0.04332 | -4.61 | 0.01417 |
| STOML1   | -3.9  | 0.02312 | -4.85 | 0.00217 |
| TAF2B    | 2.39  | 0.02025 | 3.81  | 0.00287 |
| TAF3     | -6.68 | 0.0209  | -4.52 | 0.0109  |
| TAL2     | 3.74  | 0.00717 | 3.16  | 0.00158 |
| TBP      | -3.81 | 0.0434  | -5.96 | 0.02802 |
| TGIF     | -3.55 | 0.03617 | -7.54 | 0.00563 |
| TIEG     | 1.93  | 0.04504 | 3.72  | 0.02681 |
| TITF1    | -3.74 | 0.01405 | -3.96 | 0.00124 |
| TMC1     | 3.36  | 0.01336 | 3.98  | 0.00194 |
| TNRC15   | 2.61  | 0.00243 | 3.44  | 0.00894 |
| TNRC9    | -5.03 | 0.02731 | -7.67 | 0.00168 |
| Wnt16    | 2.93  | 0.01211 | 2.28  | 0.00781 |
| Wnt4     | 5.48  | 0.01669 | 4.16  | 0.03894 |
| Wnt9b    | 4.03  | 0.01186 | 3.44  | 0.02481 |
| ZBTB26   | -4.13 | 0.04256 | -7.75 | 0.00001 |
| ZFPM1    | 1.76  | 0.01364 | 2.18  | 0.00425 |
| ZNF161   | 3.05  | 0.01979 | 2.43  | 0.03695 |
| ZNF503   | -2.12 | 0.01954 | -1.51 | 0.0222  |
| ZYX      | 2.9   | 0.0317  | 5.03  | 0.00029 |

Supplemental Table S5. Average fold changes in LRP5 siRNA treatments relative to GFP siRNA treated controls. All fold changes > 1.3 and p-value < 0.05.

| GeneID | Average fold change | P-value |
|--------|---------------------|---------|
| ACVR1  | 2.64                | 0.04106 |
| ACVR1C | 2.8                 | 0.00961 |
| AEBP2  | 2.72                | 0.04307 |

|           |        |         |
|-----------|--------|---------|
| ALDH3A2   | -5.08  | 0.01125 |
| ALX4      | -9.53  | 0.00017 |
| AMOT      | -1.96  | 0.04339 |
| ANP32A    | 2.02   | 0.01977 |
| ARC       | 1.9    | 0.02585 |
| ARF6      | 1.55   | 0.03909 |
| ARNTL2    | -3.23  | 0.00126 |
| ARTN      | -11.28 | 0.00001 |
| ASCL1     | -4.54  | 0.00225 |
| ATOH1     | 3.23   | 0.01383 |
| ATRX      | 4.16   | 0.00097 |
| BATF3     | 2.86   | 0.007   |
| BAZ2B     | 2.72   | 0.00454 |
| BETA3     | 2.1    | 0.0207  |
| BLZF1     | 9.14   | 0.00041 |
| BMI1      | -1.87  | 0.00989 |
| Bmp2      | 2.03   | 0.01319 |
| Bmp3      | 3.48   | 0.01031 |
| BMP4      | -11.43 | 0.00144 |
| BRD1      | -4.57  | 0.00571 |
| BSX       | 2.07   | 0.03288 |
| c14orf166 | -3.52  | 0.04382 |
| CATH1     | 7.24   | 0.00569 |
| CCND3     | -4.8   | 0.01255 |
| CCNI      | -21.3  | 0.00624 |
| CDC2      | 2.1    | 0.00694 |
| CDC2L5    | -4.97  | 0.01608 |
| CDK2      | -7.83  | 0.00585 |
| CDK8      | -2.45  | 0.02345 |
| CDKN2C    | -3.26  | 0.00425 |
| CHD1      | -8.75  | 0.00006 |
| CITED2    | -6.73  | 0.00214 |
| CKS1B     | -11.9  | 0.03247 |
| CREB3L2   | -3.29  | 0.02514 |
| CSRP2     | -3.15  | 0.0047  |
| CTNNB1    | 3      | 0.01848 |
| CYLD      | -3.25  | 0.00989 |
| DAZAP1    | -8.49  | 0.00044 |
| DCP1A     | 6.21   | 0.02201 |
| DEAF1     | -5.48  | 0.00067 |
| DKK3      | -2.89  | 0.01078 |
| DII4      | 3.34   | 0.00839 |
| DPF3      | 1.36   | 0.01931 |
| DR1       | 4.27   | 0.00166 |
| EBF       | -1.93  | 0.01492 |
| EED       | 3.15   | 0.04982 |
| EEF1A1    | -7.04  | 0.00292 |
| ELAVL2    | 2.23   | 0.04067 |
| ELF3      | 9.39   | 0.00001 |
| EP300     | -2.94  | 0.00879 |

|              |       |         |
|--------------|-------|---------|
| ETS1         | -1.55 | 0.00004 |
| EVX1         | -4.98 | 0.01245 |
| EYA1         | 1.8   | 0.00946 |
| FAM48A       | 1.85  | 0.00125 |
| FEZL         | -3.47 | 0.03295 |
| FEZL         | -8.08 | 0.00069 |
| Fgf10        | 3.21  | 0.01058 |
| Fgf13        | -7.15 | 0.00008 |
| Fgf16        | -8.65 | 0.00012 |
| Fgf20        | 3.33  | 0.00134 |
| Fgf4         | -3.48 | 0.0136  |
| FGFR1_exon13 | 2.21  | 0.00847 |
| Fgfr4        | -2.43 | 0.0098  |
| FHL2         | -4.74 | 0.00113 |
| FKBP1A       | 2.68  | 0.00847 |
| FLJ10300     | -5.75 | 0.00179 |
| FLJ10697     | 2.42  | 0.0287  |
| FLJ11040     | 4.34  | 0.00148 |
| FLJ36155     | -4.72 | 0.00028 |
| FMR2         | -2.55 | 0.02594 |
| FOG2         | -3.1  | 0.01669 |
| FOXA2        | 4.44  | 0.03313 |
| FOXC2        | -3.14 | 0.00345 |
| FOXG1A       | 1.91  | 0.0354  |
| FOXP1        | -7.02 | 0.00362 |
| FREQ         | 4.2   | 0.02041 |
| GADD45       | -5.44 | 0.01497 |
| GATA3        | 2.52  | 0.02665 |
| GDF1         | 3.48  | 0.01779 |
| GDF8         | -3.44 | 0.00982 |
| GDNF         | 3.94  | 0.00519 |
| GJA1         | 3.27  | 0.00044 |
| GJB6         | 1.72  | 0.02614 |
| GLI3         | -3.43 | 0.03925 |
| GPRC5C       | 5.49  | 0.00002 |
| GTF3C1       | -2.89 | 0.01911 |
| HD           | -9.82 | 0.00038 |
| HES5         | 1.99  | 0.02062 |
| HEY1         | -2.94 | 0.02647 |
| HEYL         | -2.66 | 0.03782 |
| HMGB3        | 2.6   | 0.01282 |
| HMGIC        | 1.83  | 0.00173 |
| HMGXB3       | 1.97  | 0.03002 |
| HOXA3        | 7.86  | 0.00433 |
| HOXA7        | -7.39 | 0.00383 |
| HOXA9        | 2.95  | 0.00017 |
| HOXB3        | 2.97  | 0.01981 |
| HOXC6        | 2.96  | 0.02211 |
| HPCA         | 2.28  | 0.00685 |
| HPCAL1       | 2.89  | 0.03793 |

|           |       |         |
|-----------|-------|---------|
| HSF2BP    | -3.56 | 0.02365 |
| HSPA8     | 5.8   | 0.03527 |
| HUMPPA    | 2.24  | 0.0009  |
| ID2       | -1.58 | 0.01516 |
| ID3       | -7.19 | 0.00029 |
| IHH       | 2.42  | 0.02436 |
| IRF2      | -3.91 | 0.00051 |
| IRF6      | 3.02  | 0.00829 |
| IVNS1ABP  | -7.08 | 0.00008 |
| JARID1A   | -6.81 | 0.0004  |
| JUN       | 2.43  | 0.00097 |
| KCNN2     | 6.52  | 0.03031 |
| KIAA0130  | -5.5  | 0.041   |
| KIAA0293  | -1.74 | 0.02188 |
| KIAA1190  | 4.99  | 0.00682 |
| KLF1      | -3.31 | 0.0008  |
| KLF5      | -3.01 | 0.00963 |
| KLHL1     | 3.12  | 0.00349 |
| KLHL25    | 3.91  | 0.00084 |
| KLHL3     | -6.42 | 0.00438 |
| KLHL9     | 3.87  | 0.0154  |
| LAF4      | -4.58 | 0.01076 |
| LEF1      | -1.47 | 0.03148 |
| LHX5      | -4.76 | 0.01065 |
| LHX6      | -2.41 | 0.01841 |
| LHX8      | 2.43  | 0.00785 |
| LHX9      | -4.21 | 0.01238 |
| LMO7      | 1.49  | 0.04261 |
| LMX1B     | -3.01 | 0.02745 |
| LOC416414 | 3.85  | 0.03566 |
| LOC51042  | 2.4   | 0.00843 |
| LOC51131  | 3.25  | 0.01797 |
| LOC51652  | 2.94  | 0.00971 |
| LRP5      | -5.71 | 0.00035 |
| LRP6      | 4.42  | 0.00466 |
| LZTS1     | 2.54  | 0.00499 |
| MADH1     | -3.46 | 0.03198 |
| MADH1     | 2.47  | 0.02564 |
| MADH3     | -1.78 | 0.04044 |
| MADH7     | -5.62 | 0.00209 |
| MADH9     | 2.29  | 0.00119 |
| MBNL2     | -3.73 | 0.00118 |
| MEF2D     | -2.68 | 0.01817 |
| MGC16733  | -7.36 | 0.00152 |
| MIB1      | 1.53  | 0.01072 |
| MID2      | -7.97 | 0.00542 |
| MLLT4     | 2.17  | 0.03512 |
| MLLT6     | -5.77 | 0.00013 |
| MNT       | 4.33  | 0.01327 |
| MSX1      | 5.83  | 0.00006 |

|          |       |         |
|----------|-------|---------|
| MTA1     | -3.62 | 0.00882 |
| MTF1     | -2.93 | 0.01283 |
| MTF2     | -2.95 | 0.01069 |
| MXD4     | -2.03 | 0.02043 |
| MYH9     | 3.8   | 0.0136  |
| MYNN     | -2.71 | 0.0294  |
| MYO6     | -2.99 | 0.00612 |
| MYOD1    | -7.18 | 0.00812 |
| MYT1     | -3.01 | 0.01649 |
| MYT1L    | -4.05 | 0.00709 |
| NCOA2    | -5.16 | 0.00074 |
| NEUROD6  | -7.69 | 0.00011 |
| NEUROG2  | -2.56 | 0.01362 |
| NKX2-5   | 2.28  | 0.03865 |
| NKX2C    | -1.93 | 0.03741 |
| NNF1B    | -1.81 | 0.00422 |
| NONO     | 3.77  | 0.00351 |
| NR1I3    | -4.78 | 0.01252 |
| NR2C2    | -3.41 | 0.01038 |
| NR2E1    | 7.54  | 0.00036 |
| NRP1     | 3.57  | 0.00132 |
| NUP153   | -6.9  | 0.01001 |
| OSR2     | 5.74  | 0.00175 |
| OVOL2    | -6.13 | 0.04356 |
| p300/CBP | 1.62  | 0.00955 |
| PAX2     | -3.39 | 0.0087  |
| PAX3     | -3.02 | 0.00159 |
| PBX3     | 1.98  | 0.02499 |
| PCMT1    | -9.28 | 0.00059 |
| PDEF     | -2.33 | 0.03649 |
| PGR      | 2.37  | 0.02879 |
| PHF16    | 1.9   | 0.03335 |
| PLTP     | -10   | 0.00056 |
| PME-1    | 5.02  | 0.00368 |
| PMX1     | -5.67 | 0.01022 |
| PPARA    | 2.64  | 0.04734 |
| PPARBP   | 4     | 0       |
| PPP1R14C | 2.9   | 0.00712 |
| PRDM16   | -2.73 | 0.03975 |
| PRDM5    | -2.52 | 0.00406 |
| PRES     | 3.88  | 0.0293  |
| PROP1    | -5.57 | 0.04858 |
| PRPF4    | 2.7   | 0.01283 |
| PSIP1    | 5.3   | 0.04972 |
| PSMC1    | 3     | 0.00294 |
| PTX3     | 2.35  | 0.00055 |
| R32184_3 | 2.57  | 0.01586 |
| RARA     | -3.12 | 0.00287 |
| RBBP5    | 3.19  | 0.03419 |
| RCOR1    | 1.67  | 0.01011 |

|         |       |         |
|---------|-------|---------|
| RERE    | 2.47  | 0.01007 |
| RIP60   | -3.13 | 0.00359 |
| RNF24   | 2.48  | 0.02289 |
| Rora    | -4.56 | 0.00041 |
| Rxrg    | -7.28 | 0.00093 |
| SCA2    | -6.67 | 0.00041 |
| SCML4   | 1.72  | 0.00785 |
| SHH     | -5.02 | 0.00269 |
| SHH:    | 2.2   | 0.02928 |
| SIAH1   | -4.16 | 0.04671 |
| SIX1    | 2.98  | 0.00678 |
| SIX3    | 3.04  | 0.02718 |
| SKIL    | 4.78  | 0.00017 |
| SMARCA5 | 10.48 | 0.00006 |
| SNW1    | 5.2   | 0.00071 |
| SOX13   | 3.91  | 0.00362 |
| SOX2    | -2.7  | 0.01294 |
| SOX4    | 2.71  | 0.0024  |
| SOX4    | 3.26  | 0.02851 |
| SPOP    | -4.61 | 0.01417 |
| STAT3   | -3.79 | 0.01129 |
| STOML1  | -4.85 | 0.00217 |
| SUB1    | 3.63  | 0.00305 |
| SUPT4H1 | -4.27 | 0.03636 |
| SUV39H1 | 4.48  | 0.01877 |
| TADA2L  | -2.64 | 0.00338 |
| TAF-172 | 2.24  | 0.04965 |
| TAF2B   | 3.81  | 0.00287 |
| TAF2C2  | -5.59 | 0.00737 |
| TAF3    | -4.52 | 0.0109  |
| TAF5L   | 3.45  | 0.02294 |
| TAL2    | 3.16  | 0.00158 |
| TBP     | -5.96 | 0.02802 |
| TBX2    | -5.73 | 0.01713 |
| TBX6    | 2.76  | 0.03092 |
| TCF21   | 2.97  | 0.03116 |
| TCF7    | 3.52  | 0.00178 |
| TCFL1   | -2.36 | 0.00676 |
| TEAD1   | -2.75 | 0.04778 |
| TECPR1  | -5.33 | 0.0013  |
| TEK     | 4.75  | 0.00239 |
| TGIF    | -7.54 | 0.00563 |
| TIE1    | 3.91  | 0.0164  |
| TIEG    | 3.72  | 0.02681 |
| TITF1   | -3.96 | 0.00124 |
| TMC1    | 3.98  | 0.00194 |
| TNRC15  | 3.44  | 0.00894 |
| TNRC6   | 3.61  | 0.00031 |
| TNRC9   | -7.67 | 0.00168 |
| TSC22   | -1.54 | 0.01957 |

|        |       |         |
|--------|-------|---------|
| VEGFC  | -3.57 | 0.02917 |
| VEGFR1 | 3.16  | 0.00204 |
| VEGFR3 | 3.81  | 0.00672 |
| WDR45L | 3.66  | 0.0403  |
| Wnt16  | 2.28  | 0.00781 |
| Wnt4   | 4.16  | 0.03894 |
| Wnt9b  | 3.44  | 0.02481 |
| ZBTB26 | -7.75 | 0.00001 |
| ZFP276 | 1.94  | 0.0144  |
| ZFP3   | 4.19  | 0.02637 |
| ZFPM1  | 2.18  | 0.00425 |
| ZFX    | -1.55 | 0.02596 |
| ZID    | 10.59 | 0.00002 |
| ZNF161 | 2.43  | 0.03695 |
| ZNF395 | 4.71  | 0.02937 |
| ZNF503 | -1.51 | 0.0222  |
| ZYX    | 5.03  | 0.00029 |

Supplemental Table S6. Average fold changes in PAX2 siRNA treatments relative to GFP siRNA treated controls. All fold changes > 1.3 and p-value < 0.05.

| Gene      | Average fold change | P-value |
|-----------|---------------------|---------|
| BRD1      | -1.34               | 0.03    |
| CCNG1     | -1.71               | 0.03232 |
| CHKCHOX4D | 1.49                | 0.00805 |
| E2F4      | 1.36                | 0.00667 |
| EGLN1     | -1.48               | 0.04962 |
| GTF2B     | -1.64               | 0.02674 |
| GTF2H3    | 1.44                | 0.03359 |
| HIF1A     | 1.34                | 0.02088 |
| HOXC11    | 1.36                | 0.03932 |
| HOXD4     | 1.56                | 0.02156 |
| KIAA1190  | 1.39                | 0.00187 |
| KLF2      | 1.49                | 0.00585 |
| LHX9      | 1.56                | 0.01101 |
| MAFA      | -1.49               | 0.011   |
| MLLT1     | 1.57                | 0.00292 |
| MYT1L     | -1.51               | 0.00162 |
| NFYC      | 1.35                | 0.00849 |
| NPTXR     | 1.31                | 0.02901 |
| PAX2      | -1.61               | 0.00609 |
| PKNOX1    | -1.37               | 0.0315  |
| SOX10     | 1.33                | 0.04559 |
| TBX22     | 1.45                | 0.02754 |
| TLE4      | -1.35               | 0.04592 |
| TNRC6     | 1.32                | 0.00481 |
| Wnt4      | 1.34                | 0.04654 |
| YBX1      | 1.32                | 0.00213 |

|        |       |         |
|--------|-------|---------|
| ZFAND6 | -1.49 | 0.01723 |
| ZMYND8 | -1.56 | 0.03515 |

Supplemental Table S7. Average fold changes in PAX5 siRNA treatments relative to GFP siRNA treated controls. PAX5 knockdown were confirmed by end-point semi-quantitative PCR, all other fold changes are > 1.3 and p-value < 0.05.

| Gene         | Average fold change | P-value |
|--------------|---------------------|---------|
| BMP4         | -1.3                | 0.02255 |
| BTF3         | -1.32               | 0.0111  |
| BUB3         | -1.83               | 0.00815 |
| CDC20        | -1.42               | 0.04856 |
| CDC25A       | -1.35               | 0.02621 |
| DCP1A        | 1.4                 | 0.00117 |
| EIFJ3        | 1.52                | 0.01814 |
| ETV4         | -1.31               | 0.00654 |
| Fgf10        | 1.59                | 0.03598 |
| FGF5         | 1.55                | 0.03268 |
| FLJ31751     | -1.34               | 0.04444 |
| GAK          | -1.34               | 0.03973 |
| GCN5L2       | -1.44               | 0.01275 |
| GFI1B        | -1.39               | 0.04111 |
| HOXD4        | -1.92               | 0.00128 |
| IGHMBP2      | -1.38               | 0.00337 |
| KIAA1388     | -1.33               | 0.03123 |
| KLF15        | -1.4                | 0.04076 |
| KLHL1        | -1.41               | 0.04846 |
| LMX1A        | 1.4                 | 0.0021  |
| LOC51580     | -1.74               | 0.0301  |
| MED16        | 1.5                 | 0.01025 |
| MEF2D        | -1.63               | 0.0138  |
| MGC16733     | -1.89               | 0.0252  |
| MLLT1        | -1.63               | 0.02207 |
| MYT1L        | -1.61               | 0.01409 |
| Nog          | -1.34               | 0.00048 |
| NOS3         | 1.36                | 0.02308 |
| ODD          | -1.33               | 0.00169 |
| p27KIP1      | -1.46               | 0.00641 |
| P2rx7-v1-2-3 | -1.34               | 0.01505 |
| PCAF         | 1.48                | 0.04489 |
| PFKL         | -1.38               | 0.01209 |
| PKNOX1       | 1.69                | 0.03063 |
| RBPJL        | -1.37               | 0.01504 |
| RCOR1        | -1.38               | 0.03744 |
| Sgk          | 1.44                | 0.04923 |



|         |       |         |
|---------|-------|---------|
| SNAPC1  | -1.32 | 0.01579 |
| SOX13   | -1.37 | 0.0008  |
| Sparcl1 | -1.5  | 0.02325 |
| STAT3   | -1.34 | 0.01924 |
| TBX2    | -1.33 | 0.02284 |
| TEAD3   | -1.32 | 0.02935 |
| TECPR1  | -1.4  | 0.04376 |
| TIEG    | -1.38 | 0.00094 |
| TP53mm1 | 1.55  | 0.00494 |
| Wnt4    | 1.37  | 0.0071  |
| YBX1    | -1.5  | 0.02443 |

Supplemental Table S8. Average fold changes in WNT4 siRNA treatments relative to GFP siRNA treated controls. All fold changes > 1.5 and p-value < 0.05.

| Gene     | Average fold change | P-value |
|----------|---------------------|---------|
| ALX4     | 2.18                | 0.00029 |
| AMOT     | -1.77               | 0.04323 |
| ANAPC2   | -2.26               | 0.00004 |
| ANG1     | 1.84                | 0.02186 |
| ARID1A   | -1.52               | 0.0402  |
| ARNT2    | 1.52                | 0.01731 |
| ATRX     | -1.56               | 0.02943 |
| BACH2    | -1.9                | 0.0001  |
| BARX2    | 2.77                | 0.04025 |
| BATF3    | -2.64               | 0.02465 |
| BC052269 | -2.53               | 0.01787 |
| BC052625 | -2.06               | 0.0005  |
| BCL6B    | -1.73               | 0.00157 |
| BETA3    | 1.65                | 0.00228 |
| BHLHB2   | -1.82               | 0.03654 |
| Bmp11    | -2.79               | 0.0002  |
| Bmp15    | -1.5                | 0.0073  |
| BMP15    | 1.6                 | 0.01594 |
| Bmp6     | -2.19               | 0.00427 |
| Bmp8a    | -1.61               | 0.00026 |
| BRN-3A   | -1.91               | 0.00396 |
| BSX      | -1.66               | 0.00504 |
| BTBD14A  | -1.74               | 0.00318 |
| Calb2    | 2.64                | 0.00915 |
| CALM3    | 1.99                | 0.00616 |
| CCNB2    | -1.7                | 0.01041 |
| CCNB3    | -1.74               | 0.00002 |
| CCNE1    | -1.66               | 0.02414 |
| CCNL2    | -2.51               | 0.01754 |
| CDK11    | -1.89               | 0.01698 |
| CDKL2    | -2.15               | 0.00013 |
| CDKN2C   | -2.5                | 0.00009 |

|           |       |         |
|-----------|-------|---------|
| CHD1      | -2.19 | 0.00999 |
| CKS1B     | -1.8  | 0.00723 |
| CLDN14    | -2.25 | 0.00672 |
| Clorf78   | -1.82 | 0.02775 |
| Cnn1      | -1.51 | 0.03096 |
| CUTL1     | -1.9  | 0.00725 |
| DKK3      | -2.01 | 0.00213 |
| Dll1      | 1.6   | 0.00038 |
| EGR2      | -1.58 | 0.02791 |
| EN2       | -2.41 | 0.00338 |
| ERK       | -1.56 | 0.04275 |
| EZH1      | -1.83 | 0.00974 |
| FBI1      | 1.71  | 0.03169 |
| Fgf8      | -1.58 | 0.04309 |
| Fgfr3_UTR | -2.05 | 0.01167 |
| FKBP1A    | -1.63 | 0.00626 |
| FKSG11    | 1.58  | 0.01361 |
| FLJ11040  | -1.54 | 0.0004  |
| FLJ36155  | -2.49 | 0.00001 |
| FOG2      | -5.9  | 0.01187 |
| FOXD3     | 1.94  | 0.00238 |
| FOXP4     | -2.3  | 0.00002 |
| FRZB      | -2.78 | 0.00003 |
| FUBP3     | 1.73  | 0.00436 |
| GAK       | -1.87 | 0.03287 |
| GCN5L2    | -1.71 | 0.01028 |
| GDF1      | -1.8  | 0.03196 |
| GFI1B     | -1.97 | 0.00905 |
| GPA33     | -2.18 | 0.00208 |
| GSC       | 1.63  | 0.03557 |
| GTF2F2    | -1.7  | 0.04336 |
| HAND1     | 2.34  | 0.00595 |
| HAND2     | -1.65 | 0.00028 |
| HAS2      | -2.05 | 0.01861 |
| HAS2_UTR  | -2.3  | 0.00037 |
| HES6      | 1.61  | 0.00206 |
| HEY2      | -1.91 | 0.00169 |
| HKR3      | -4.44 | 0.02349 |
| HMG1      | 2.57  | 0.0053  |
| HMX2      | -1.55 | 0.00169 |
| HOX11     | -2.22 | 0.0124  |
| HOXA10    | 1.61  | 0.0197  |
| HOXD8     | 2.35  | 0.02479 |
| Hprt1     | -1.67 | 0.04928 |
| Hsp90ab1  | 1.65  | 0.02    |
| HUMPPA    | 1.66  | 0.0016  |
| IGHMBP2   | -3.08 | 0.0317  |
| IRF6      | -1.85 | 0.04581 |
| ISL1      | 1.66  | 0.04853 |
| KLF15     | -1.76 | 0.04501 |

|           |       |         |
|-----------|-------|---------|
| KLF2      | -1.69 | 0.01722 |
| KLHL14    | 1.69  | 0.00775 |
| KRML      | -1.74 | 0.01049 |
| LAF4      | -2.05 | 0.00543 |
| LHX3      | 1.97  | 0.00003 |
| LHX8      | 1.74  | 0.02232 |
| LMX1A     | 2.14  | 0.00075 |
| LOC152485 | 2.17  | 0.00399 |
| LOC771525 | -1.74 | 0.00638 |
| MADH9     | 2.88  | 0.00496 |
| MED14     | 1.73  | 0.01796 |
| MED16     | 1.87  | 0.00008 |
| Mfng      | -2.39 | 0.00027 |
| MLLT1     | -1.68 | 0.00761 |
| MLLT4     | -1.75 | 0.02114 |
| MLLT7     | 1.83  | 0.00015 |
| MSX2      | -2.39 | 0.00367 |
| MYC       | -2.64 | 0.01802 |
| MYH9      | -2.15 | 0.00664 |
| MYNN      | -2.11 | 0.00052 |
| MYT1      | -1.55 | 0.02223 |
| NAB1      | -2.55 | 0.00014 |
| NFE2L1    | -1.79 | 0.03015 |
| NKRF      | 1.69  | 0.00838 |
| NKX2-5    | 2.05  | 0.00246 |
| NKX6-2    | -3.36 | 0.02093 |
| Notch1    | -1.85 | 0.00001 |
| Notch2    | -1.82 | 0.00121 |
| NRP1      | -2.36 | 0.02026 |
| NUCKS     | -2.12 | 0.01804 |
| Otog      | -1.83 | 0.04318 |
| p21       | -3.37 | 0.02447 |
| P2ry4     | -1.84 | 0.01216 |
| p300/CBP  | -2.1  | 0.03698 |
| PARD3     | 1.75  | 0.00264 |
| PAX6      | -1.87 | 0.00107 |
| PCQAP     | 1.66  | 0.03955 |
| PGR       | 1.92  | 0.03528 |
| PITX3     | 1.71  | 0.01013 |
| PLRG1     | 1.54  | 0.04161 |
| PME-1     | 2.33  | 0.00008 |
| POU4F2    | -1.91 | 0.00753 |
| PPARBP    | -3.32 | 0.00017 |
| PRDM15    | -1.65 | 0.00047 |
| PRDM16    | -2.62 | 0.00042 |
| PRDM5     | -1.67 | 0.00414 |
| PSIP1     | 1.64  | 0.00228 |
| PTX3      | -1.52 | 0.03467 |
| RBPJL     | -1.97 | 0.00297 |
| RELB      | -2    | 0.00771 |

|         |       |         |
|---------|-------|---------|
| RFX5    | 1.59  | 0.00692 |
| RIC3    | -1.74 | 0.00948 |
| RIP60   | 2.07  | 0.00136 |
| Rora    | -1.74 | 0.00671 |
| RYBP    | -1.81 | 0.00201 |
| SATB2   | -1.79 | 0.00136 |
| SHH     | 1.71  | 0.00549 |
| SIX1    | -2.3  | 0.00239 |
| SIX6    | -1.71 | 0.0363  |
| SKP1    | 1.82  | 0.00431 |
| Slc18a1 | 1.57  | 0.02583 |
| SMARCC1 | -1.87 | 0.04588 |
| Smo     | -1.78 | 0.01981 |
| SON     | 2.05  | 0.00015 |
| SOX10   | -2.87 | 0.00012 |
| SOX13   | -1.63 | 0.03549 |
| SOX8    | 1.61  | 0.0491  |
| SPOP    | 2.15  | 0.04223 |
| SPRY4   | -2.05 | 0.01979 |
| SRF     | -2.63 | 0.02924 |
| STT3A   | -1.93 | 0.01513 |
| SUB1    | -1.86 | 0.03622 |
| TAF4    | -2.77 | 0.01191 |
| TAL2    | -2.29 | 0.03779 |
| TBX2    | -1.58 | 0.00274 |
| TCEB1   | -3.22 | 0.01058 |
| TCF15   | 2.14  | 0.00413 |
| TCF7    | -2.17 | 0.03236 |
| TFAP2A  | -3    | 0.0001  |
| TLX3    | 1.87  | 0.00308 |
| Tnf     | -1.64 | 0.03914 |
| TP63    | 1.68  | 0.03256 |
| TSC22   | -2.59 | 0.00311 |
| USF2    | 2.5   | 0.02211 |
| VSX     | -2.04 | 0.0077  |
| Wnt16   | -3.07 | 0.02395 |
| Wnt4    | -2.27 | 0.00885 |
| Wnt6    | -2.04 | 0.00001 |
| Wnt7b   | -1.62 | 0.00598 |
| Wnt9a   | -1.54 | 0.03195 |
| Wnt9b   | -2.59 | 0.00007 |
| ZDHHC17 | 1.7   | 0.02356 |
| ZFP276  | -1.91 | 0.02169 |
| ZNF238  | 1.97  | 0.00991 |

Supplemental Table S9. Average fold changes in BTAF1 siRNA treatments relative to GFP siRNA treated controls. All fold changes > 1.3 and p-value < 0.05.

| Gene | Average fold | P-value |
|------|--------------|---------|
|------|--------------|---------|

|                | change |         |  |
|----------------|--------|---------|--|
| ARNTL          | -1.66  | 0.02824 |  |
| ASCL1          | 1.47   | 0.00156 |  |
| Atp1b2         | -1.31  | 0.03605 |  |
| Atp2b2         | -1.31  | 0.02807 |  |
| BANP           | -1.32  | 0.02394 |  |
| BATF3          | -1.38  | 0.027   |  |
| BC052269       | -1.47  | 0.04729 |  |
| Bmp3           | -1.35  | 0.02365 |  |
| Bmp4           | 1.79   | 0.02849 |  |
| BRD1           | 3.7    | 0.0167  |  |
| BRN-3A         | -1.46  | 0.00223 |  |
| BTAF1          | -1.57  | 0.00185 |  |
| Calr           | -1.3   | 0.00171 |  |
| CART1          | 1.43   | 0.02321 |  |
| CBX4           | -1.49  | 0.00962 |  |
| CDK2           | 10.03  | 0.01323 |  |
| CEBPB          | -1.34  | 0.0447  |  |
| CEBPG          | -1.5   | 0.01825 |  |
| CNNM4          | -1.44  | 0.00103 |  |
| COL5A1         | -1.38  | 0.01428 |  |
| CSRP2          | -1.38  | 0.0422  |  |
| CTNNB1         | -2.1   | 0.00012 |  |
| CUTL1          | -1.38  | 0.01135 |  |
| Dlx5-<br>exon2 | -1.48  | 0.02285 |  |
| ENG            | -1.3   | 0.01444 |  |
| EYA4           | -1.32  | 0.03376 |  |
| EZH2           | -1.43  | 0.02372 |  |
| FBXO3          | -1.43  | 0.00142 |  |
| FKHL18         | -1.68  | 0.03499 |  |
| FLJ11040       | -1.97  | 0.01685 |  |
| FOSL2          | -1.3   | 0.00931 |  |
| FOXA2          | -1.5   | 0.00823 |  |
| FOXN4          | -1.5   | 0.00189 |  |
| FOXP1          | 4.69   | 0.01984 |  |
| GCN5L2         | -1.59  | 0.00177 |  |
| GTF3C1         | -1.7   | 0.00566 |  |
| Gusb           | -1.48  | 0.02619 |  |
| HDAC1          | 1.35   | 0.01932 |  |
| HDAC2          | -1.32  | 0.02186 |  |
| HEYL           | 1.4    | 0.0202  |  |
| HMG1           | 1.45   | 0.00358 |  |
| HOXB13         | -1.76  | 0.0054  |  |
| HPCA           | -1.76  | 0.02741 |  |
| HUMPPA         | 1.58   | 0.00997 |  |
| ID2            | -2.41  | 0.042   |  |
| ID3            | 4.49   | 0.01481 |  |
| IFT172         | -1.36  | 0.02401 |  |
| IVNS1ABP       | 2.28   | 0.00241 |  |
| KCNIP4         | 1.38   | 0.02154 |  |

|         |       |         |
|---------|-------|---------|
| KLF15   | -1.34 | 0.02901 |
| KLF7    | -1.55 | 0.00865 |
| KLHL1   | -1.59 | 0.02272 |
| KRML    | -1.45 | 0.0245  |
| LHX5    | -1.54 | 0.01711 |
| LHX6    | -1.4  | 0.01723 |
| LRP5    | 1.4   | 0.00675 |
| LRP5_2  | -1.44 | 0.02223 |
| MADH5   | 2.2   | 0.01321 |
| Mfng    | -1.31 | 0.0017  |
| MLL3    | -1.38 | 0.03292 |
| MNT     | -1.42 | 0.0323  |
| MSX1    | -1.33 | 0.0036  |
| MYO5A   | -1.56 | 0.00054 |
| MYT1L   | 1.87  | 0.02871 |
| NCOA2   | 1.68  | 0.03353 |
| NFE2L2  | 7.41  | 0.01504 |
| NFKBIA  | -1.54 | 0.01004 |
| NNF1B   | -1.91 | 0.00278 |
| Nog     | -1.34 | 0.00164 |
| NR2F2   | -1.75 | 0.00481 |
| NR5A2   | 1.9   | 0.04283 |
| NUP153  | 1.39  | 0.01928 |
| OVOL2   | -1.5  | 0.01145 |
| PCGF3   | -1.38 | 0.00028 |
| PCMT1   | 5.63  | 0.01401 |
| PCSK6   | -1.35 | 0.00244 |
| PDX1    | -1.37 | 0.03395 |
| Penk1   | 1.44  | 0.00942 |
| PGR     | 1.41  | 0.0009  |
| PPIB    | -1.6  | 0.01093 |
| PRDM5   | 1.35  | 0.02742 |
| PROX1   | -1.36 | 0.01243 |
| PSIP1   | 1.96  | 0.00498 |
| RALGDS  | -1.46 | 0.01745 |
| RCOR1   | 2.25  | 0.0366  |
| RIP60   | 1.67  | 0.02657 |
| RIPX    | -1.38 | 0.04041 |
| RUNX1T1 | 2.37  | 0.03541 |
| RUNX2   | -1.66 | 0.01747 |
| RXR     | -1.38 | 0.00795 |
| S100a9  | -1.47 | 0.02575 |
| SAFB    | -1.37 | 0.02966 |
| SATB2   | -1.3  | 0.0043  |
| SCML4   | -1.44 | 0.03003 |
| SNW1    | -1.31 | 0.00545 |
| SOX1    | 1.73  | 0.01092 |
| SOX10   | -1.45 | 0.00293 |
| SOX9    | -1.74 | 0.03898 |
| SRF     | -1.38 | 0.01785 |

|        |       |         |
|--------|-------|---------|
| TAF2D  | -1.35 | 0.03415 |
| TAL2   | -1.48 | 0.01534 |
| TBP    | 1.85  | 0.03976 |
| TBX22  | 1.61  | 0.0094  |
| TCEB1  | -1.92 | 0.04614 |
| TCF1   | 1.31  | 0.01141 |
| TCF7L2 | -1.63 | 0.01806 |
| TEAD3  | -1.34 | 0.02092 |
| THRA   | -1.33 | 0.03067 |
| Wnt1   | -1.39 | 0.00306 |
| Wnt16  | -1.67 | 0.00082 |
| Wnt5a  | -1.51 | 0.00442 |
| Wnt7b  | -1.42 | 0.00275 |
| Wnt9b  | -1.39 | 0.02715 |
| ZBTB20 | -1.64 | 0.02039 |
| ZFP276 | -1.71 | 0.04442 |
| ZFX    | -1.5  | 0.0368  |
| ZHX1   | -1.58 | 0.03711 |
| ZNF384 | -1.34 | 0.02363 |
| ZNF703 | -1.38 | 0.01542 |

Supplemental Table S10. Primer sequences for *in vitro* dicer products and chemically synthesized dicer substrate RNA (DsiRNA) target sequences.

| Accession    | siRNA Target | Forward Primer             | Reverse Primer             |
|--------------|--------------|----------------------------|----------------------------|
| NM_206859    | CEBPG        | AGCAAGCAGGGAAAGAAGAA       | TTTGAGCTGGGTGACCCTTT       |
| X60063       | JUND         | ATCGATATGGACACGCAGGA       | CTGAGCACCTTCTGCTTGAG       |
| XM_421689    | TAF172       | TCGAAAACCTTGGAGAACTATGG    | TCCCCCGTGAGACAGGTGAC       |
| NM_001012897 | LRP5         | CTTATTCAGGGCCATCTGGA       | AGCAGCACAGCCACATCTAA       |
| XM_001237023 | RARA         | TCCGCAATGACCGCAATAAGAAG    | GTCGGCGATGGTGAGCGTGGTGAA   |
| NM_204793    | PAX2         | CACCTCTGCTAACCCAGACC       | AGTGCCACCATCTCTGCTCT       |
| NM_204424    | PAX5         | GGG AGC ATT AAG CCT GGA GT | GTG TCG TTA TCG CAC ACT CG |
| XM_425393    | CUTL1        | GCAGCACTCACCGCCCCTTTCGTC   | GGCGTCCCCTTCCGTGGCAGAGTT   |
| NM_204590    | ID1          | ACATGAAGGGCTGCTACTCG       | TCTCTCTCAGCGGCACAGTA       |
| NM_204269    | PAX3         | CTCAGCCTCTCCCTCCAAG        | CAGGGTTCATGGGATTTGAG       |
| NM_205065    | PAX7         | AGCAACCGACGAGCAAGAT        | AAATGGTGGTGGTTGGGTAG       |
| NM_204256    | CDKN1B       | GGAGGCGCGGCAGTCGGAGTA      | CGTCGGCGGCAGGTCTTTTC       |
| NM_204642    | CBX4         | CAAACGGGAGCAAGAATCAC       | AGGAGGAGGAGGCTGAAGG        |
| XM_418879    | EZH2         | TGCAATCGCCAGACTAATTG       | TTTTGGCATTCTGAGCTGCA       |
| NM_001031031 | BCL11A       | TGTCACCAGCACACCTGTTT       | TGGAAGTGGAAACAGCAACA       |
| NM_001031596 | TRIP15       | CAAAGGGCAGTTAATGACCAG      | TTGCTGCTTGAACCTAAGTGA      |
| NM_205081    | CTNNB1       | CTGCGGGTGTACTTTGTGAA       | CTAGGATCATCTGGGCGGTA       |
| NM_003920    | TIME         | GAGAGCGTGAAGGATCTGAT       | GAACGCCTCTTTGTACGCCT       |
| NM_001006457 | PPARGC1      | GTGTGCTGAGACCACTGCAT       | CAGCCAGTACAGCAATGAGC       |

| Accession    | siRNA Target | siRNA Source | Target Sequence                     |
|--------------|--------------|--------------|-------------------------------------|
| NM_206859    | CEBPG        | Ambion       | AATAAGTGCAGATCGAAATCC               |
| X60063       | JUND         | IDT          | CCATGTTCCCTGAATGCGATATATGCG         |
| XM_421689    | BTA1F1       | IDT          | ATTGTAATCTTGCTCTCTCTGTAGGAG         |
| NM_001012897 | LRP5         | IDT          | ATCCACTTCATCAGATTTATCTTGCA          |
| NM_204536    | RARA         | IDT          | TGCTGATGAAGATCACAGAT                |
| NM_204793    | PAX2         | IDT          | TAACAGAAAGTCACTTGGTCCTTCTCT         |
| NM_204424    | PAX5         | IDT          | CAGGAGTCGTTGTACGTTGAGTACTGT         |
| NM_204783    | WNT4         | IDT          | TCC CTG CAG CGT CTG GGT CGT TTG CTC |
| NM_204783    | WNT4         | IDT          | GTT CAA GAC GTG CTG GAA AGC CAT G   |
| XM_425393    | CUX1         | IDT          | ACATTCATCTGTTACTGATT                |
| NM_204643    | CBX3         | IDT          | TGCAAACAATTATTGTGCTTCATCTTC         |
| NM_001005848 | HES1 (HRY)   | Ambion       | TGAGTGCATGAACGAGGTG                 |
| XM_419932    | MYT1L        | IDT          | ACATCTAATTGGCTCTTGGTCTTCTTT         |
| NM_205081    | CTNNB1       | IDT          | GTCGAGGAGTAATAATACAAATGGATT         |
| NM_205081    | CTNNB1       | IDT          | GAGGACCTACACTTATGAGAACTATT          |
| NM_205081    | CTNNB1       | IDT          | AAACTGTTGAATGATGAGGACCAGGTG         |
